# Supplementary material for: Mechanisms for the enhanced hydrogen desorption performance of the TiF4-catalyzed Na2LiAlH6 used for hydrogen storage
Source: Royal Society of Chemistry journal article supplement (doi:10.1039/b920270f), 2010-01-01
Supplement: b920270f.pdf [file b920270f.pdf]

## Supplementary Information:

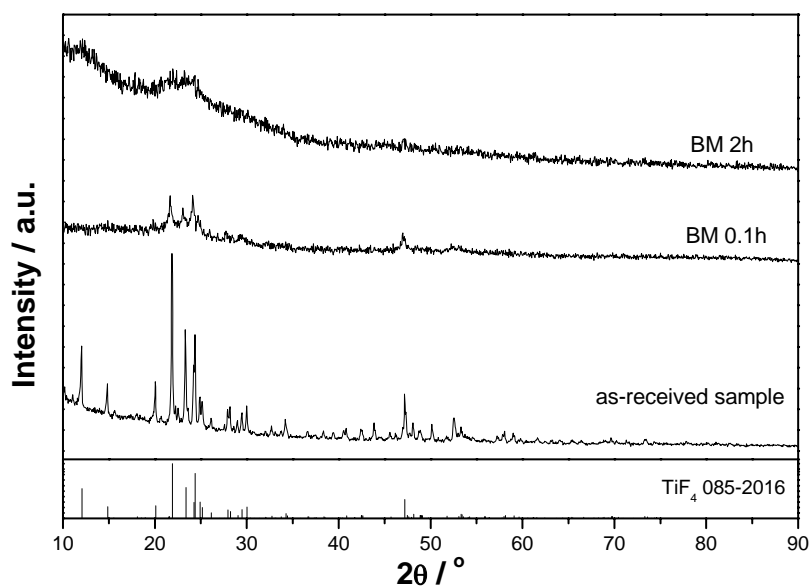

Figure-S1 XRD patterns of TiF<sub>4</sub> with different ball milling durations (After ball milling for 2h, the TiF<sub>4</sub> sample exhibited obviously the amorphous form.)

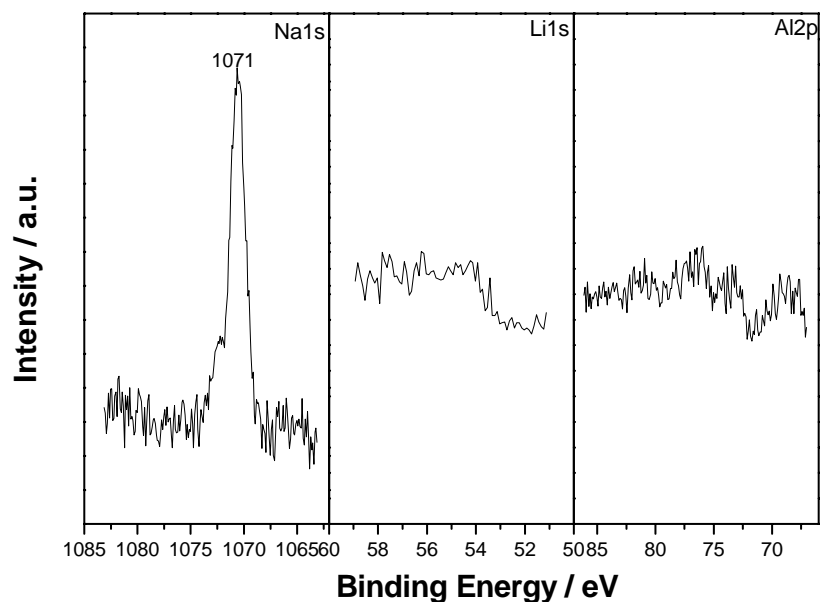

Figure-S2 High-resolution Na1s, Li1s and Al2p XPS spectra of the as-prepared Na<sub>2</sub>LiAlH<sub>6</sub> (Only Na signal was detected at the surface of the as-prepared Na<sub>2</sub>LiAlH<sub>6</sub>.)

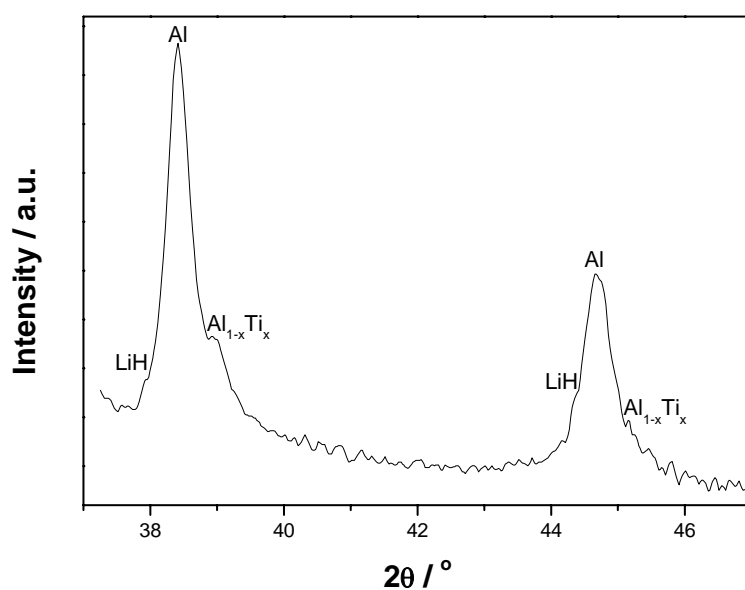

Figure-S3 XRD pattern of the dehydrogenated sample of the 20wt% TiF<sub>4</sub>-added Na<sub>2</sub>LiAlH<sub>6</sub> at 260 °C ( $2\theta = 37 - 47^\circ$ )

(It can be clearly seen that the diffraction peaks of Ti-Al solid solution with considerable intensities emerge at the high-angle side of the Al reflections.)
